# Supplementary material for: The DAWN study of dorzagliatin as add-on therapy to metformin in patients with type 2 diabetes: a randomized, double-blind, placebo-controlled, phase 3 trial
Source: Research Square preprint supplement (doi:10.21203/rs.3.rs-733332/v1), 2021-07-26
Supplement: Supplementary file 1 [file e4cd12d08965cc95cd8c5137.docx]

| **Supplementary Table 1. Changes in Glycated Hemoglobin (%) by Scheduled Visits in 24-Week Double-blind Treatment Period.** | | | | | | | | | | | |  |
| --- | --- | --- | --- | --- | --- | --- | --- | --- | --- | --- | --- | --- |
|  | **Dorzagliatin +Metformin** | | | | | **Placebo+Metformin** | | | | | **Dorzagliatin vs. Placebo** | |
|  | N | Mean(SD) | vs. Baseline | | | N | Mean(SD) | vs. Baseline | | | LS Mean Difference(95% CI) | P Value |
|  | Mean(SD) | LS Mean(SE) | 95% CI | Mean(SD) | LS Mean(SE) | 95% CI |
| Baseline | 376 | 8.24(0.595) | - | - | - | 375 | 8.28(0.590) | - | - | - | - | - |
| Week 4 | 371 | 7.55(0.714) | -0.69(0.452) | -0.71(0.024) | (-0.76,-0.66) | 374 | 8.14(0.674) | -0.15(0.397) | -0.17(0.024) | (-0.21,-0.12) | -0.54(-0.61,-0.48) | - |
| Week 8 | 365 | 7.24(0.822) | -1.01(0.663) | -1.03(0.034) | (-1.10,-0.97) | 366 | 8.06(0.790) | -0.22(0.580) | -0.24(0.034) | (-0.31,-0.18) | -0.79(-0.88,-0.70) | - |
| Week 12 | 361 | 7.13(0.928) | -1.12(0.839) | -1.13(0.040) | (-1.21,-1.05) | 354 | 8.00(0.826) | -0.27(0.664) | -0.28(0.041) | (-0.36,-0.20) | -0.85(-0.96,-0.74) | - |
| Week 16 | 354 | 7.11(0.958) | -1.14(0.911) | -1.14(0.044) | (-1.22,-1.05) | 344 | 7.95(0.842) | -0.32(0.724) | -0.32(0.044) | (-0.41,-0.24) | -0.82(-0.94,-0.69) | - |
| Week 20 | 351 | 7.18(0.984) | -1.06(0.955) | -1.05(0.046) | (-1.14,-0.96) | 345 | 7.94(0.864) | -0.33(0.738) | -0.33(0.046) | (-0.42,-0.24) | -0.72(-0.85,-0.59) | - |
| Week 24 | 335 | 7.19(1.005) | -1.05(0.978) | -1.02(0.047) | (-1.11,-0.93) | 336 | 7.90(0.851) | -0.36(0.729) | -0.36(0.048) | (-0.45,-0.26) | -0.66(-0.79,-0.53) | <0.0001 |

Least-squares (LS) mean, standard error (SE), LS mean differences, corresponding 95% confidence interval (CI) and P value were estimated using a mixed model for repeated measures in the full-analysis set. SD: standard deviation.

| **Supplementary Table 2. Changes in Fasting Plasma Glucose (mg/dl) by Scheduled Visits in 24-Week Double-blind Treatment Period.** | | | | | | | | | | | | |
| --- | --- | --- | --- | --- | --- | --- | --- | --- | --- | --- | --- | --- |
|  | **Dorzagliatin+Metformin** | | | | | **Placebo+Metformin** | | | | | **Dorzagliatin vs. Placebo** | |
|  | N | Mean(SD) | vs. Baseline | | | N | Mean(SD) | vs. Baseline | | | LS Mean Difference(95% CI) |
|  | Mean(SD) | LS Mean(SE) | 95% CI | Mean(SD) | LS Mean(SE) | 95% CI |
| Baseline | 376 | 176.04(28.818) | - | - | - | 375 | 178.92 (30.114) | - | - | - | - |
| Week 4 | 374 | 160.38(34.956) | -15.66(28.224) | -16.92(1.512) | (-19.80,-13.86) | 374 | 178.38(34.902) | -0.54(31.068) | -0.90(1.512) | (-3.78,2.16) | -16.02(-19.98,-11.88) |
| Week 8 | 368 | 158.76(34.236) | -17.46(30.744) | -18.54(1.548) | (-21.60,-15.48) | 366 | 178.02(35.136) | -0.72(30.330) | -1.26(1.548) | (-4.32,1.80) | -17.28(-21.42,-13.14) |
| Week 12 | 360 | 161.46(34.974) | -14.04(31.914) | -15.66(1.602) | (-18.72,-12.42) | 354 | 173.52(34.326) | -4.14(30.348) | -4.50(1.602) | (-7.74,-1.44) | -10.98(-15.30,-6.84) |
| Week 16 | 354 | 160.92(35.424) | -14.58(34.128) | -16.02(1.674) | (-19.26,-12.78) | 346 | 172.26(33.138) | -5.04(30.726) | -5.40(1.674) | (-8.64,-1.98) | -10.62(-15.12,-6.12) |
| Week 20 | 350 | 162.72(35.136) | -12.60(35.928) | -13.50(1.710) | (-16.92,-10.08) | 345 | 170.10(32.058) | -7.20(31.986) | -7.20(1.728) | (-10.62,-3.78) | -6.48(-10.98,-1.80) |
| Week 24 | 335 | 163.98(37.566) | -11.52(38.556) | -12.06(1.908) | (-15.84,-8.46) | 335 | 171.72(34.956) | -5.76(33.804) | -5.22(1.908) | (-9.00,-1.62) | -6.84(-12.06,-1.62) |

Least-squares (LS) mean, standard error (SE), LS mean difference and corresponding 95% confidence interval (CI) were estimated using a mixed model for repeated measures in the full-analysis set. SD: standard deviation.

| **Supplementary Table 3. Changes in 2-hour Postprandial Glucose (mg/dl) in 24-Week Double-blind Treatment Period.** | | | | | | | | | | | |
| --- | --- | --- | --- | --- | --- | --- | --- | --- | --- | --- | --- |
|  | **Dorzagliatin+Metformin** | | | | | **Placebo+Metformin** | | | | | **Dorzagliatin vs. Placebo** |
|  | N | Mean(SD) | vs. Baseline | | | N | Mean(SD) | vs. Baseline | | | LS Mean Difference(95% CI) |
|  | Mean(SD) | LS Mean(SE) | 95% CI | Mean(SD) | LS Mean(SE) | 95% CI |
| Baseline | 376 | 338.94  (55.386) | - | - | - | 374 | 343.08  (54.180) | - | - | - | - |
| Week 12 | 359 | 243.36  (71.658) | -95.58  (65.214) | -99.54  (3.114) | (-105.66,-93.42) | 353 | 300.06  (57.438) | -42.12  (55.548) | -45.00  (3.132) | (-51.12,-38.88) | -54.54  (-62.82,-46.44) |
| Week 24 | 335 | 243.90  (71.766) | -95.04  (72.090) | -98.10  (3.312) | (-104.58,-91.44) | 335 | 291.42  (56.772) | -51.66  (56.574) | -53.46  (3.312) | (-59.94,-46.98) | -44.64  (-53.28,-35.82) |

Least-squares (LS) mean, standard error (SE), LS mean differences and corresponding 95% confidence interval (CI) were estimated using a mixed model for repeated measures in the full-analysis set. SD: standard deviation.

| **Supplementary Table 4. Response Rate (Glycated Hemoglobin <7.0%) in 24-Week Double-blind Treatment Period.** | | | | | |
| --- | --- | --- | --- | --- | --- |
|  | **Dorzagliatin +Metformin** | | **Placebo+Metformin** | | **Dorzagliatin vs. Placebo** |
|  | N | n, % | N | n, % | OR(95% CI) |
| Baseline | 376 | 0 | 375 | 1(0.3) | - |
| Week 4 | 373 | 84(22.5) | 375 | 9(2.4) | - |
| Week 8 | 374 | 152(40.6) | 375 | 21(5.6) | - |
| Week 12 | 376 | 179(47.6) | 375 | 31(8.3) | - |
| Week 16 | 376 | 187(49.7) | 375 | 36(9.6) | - |
| Week 20 | 376 | 165(43.9) | 375 | 44(11.7) | - |
| Week 24 | 376 | 167(44.4) | 375 | 40(10.7) | 7.60(5.05,11.42) |

The glycated hemoglobin response rate (percentage of patients who reached a glycated hemoglobin level of less than 7.0%) was estimated based on the data imputed by last observation carried forward approach in the full analysis set. Odds ratio (OR) and 95% confidence interval (CI) between two treatment groups were estimated using the logistic regression model.

| **Supplementary Table 5. Changes in Glycated Hemoglobin (%) by Scheduled Visits in 52-Week Treatment Period.*** | | | | | | | | | | | |  |
| --- | --- | --- | --- | --- | --- | --- | --- | --- | --- | --- | --- | --- |
|  | **Dorzagliatin+Metformin** | | | | | | **Placebo+Metformin** | | | | | |
|  | **52-week Treatment** | | | **Open-label Treatment** | | | **52-week Treatment** | | | **Open-label Treatment** | | |
|  | N | Mean(SD) | Change from Baseline | N | Mean(SD) | Change from Open-Label Baseline | N | Mean(SD) | Change from Baseline | N | Mean(SD) | Change from Open-Label Baseline |
| Baseline | 376 | 8.24(0.595) | - | - | - | - | 375 | 8.28(0.590) | - | - | - | - |
| Week 4 | 371 | 7.55(0.714) | -0.69(0.452) | - | - | - | 374 | 8.14(0.674) | -0.15(0.397) | - | - | - |
| Week 8 | 365 | 7.24(0.822) | -1.01(0.663) | - | - | - | 367 | 8.06(0.789) | -0.22(0.579) | - | - | - |
| Week 12 | 361 | 7.13(0.928) | -1.12(0.839) | - | - | - | 355 | 8.00(0.825) | -0.27(0.663) | - | - | - |
| Week 16 | 354 | 7.11(0.958) | -1.14(0.911) | - | - | - | 345 | 7.95(0.842) | -0.32(0.724) | - | - | - |
| Week 20 | 351 | 7.18(0.984) | -1.06(0.955) | - | - | - | 346 | 7.94(0.863) | -0.33(0.737) | - | - | - |
| Week 24 | 335 | 7.19(1.005) | -1.05(0.978) | 349 | 7.18(1.004) | - | 336 | 7.90(0.851) | -0.36(0.729) | 343 | 7.90(0.862) | - |
| Week 28 | 326 | 7.21(1.038) | -1.03(1.005) | 326 | 7.21(1.038) | 0.05(0.366) | 325 | 7.42(0.911) | -0.85(0.809) | 325 | 7.42(0.911) | -0.48(0.388) |
| Week 34 | 320 | 7.27(1.097) | -0.96(1.056) | 320 | 7.27(1.097) | 0.11(0.609) | 312 | 7.13(0.966) | -1.15(0.886) | 312 | 7.13(0.966) | -0.77(0.639) |
| Week 40 | 321 | 7.29(1.023) | -0.94(0.976) | 321 | 7.29(1.023) | 0.15(0.692) | 296 | 7.16(1.053) | -1.13(0.962) | 296 | 7.16(1.053) | -0.76(0.787) |
| Week 46 | 305 | 7.38(1.031) | -0.85(0.977) | 305 | 7.38(1.031) | 0.22(0.842) | 301 | 7.25(1.097) | -1.04(1.014) | 301 | 7.25(1.097) | -0.66(0.896) |
| Week 52 | 312 | 7.41(1.136) | -0.81(1.059) | 312 | 7.41(1.136) | 0.28(0.979) | 301 | 7.31(1.082) | -0.96(0.971) | 301 | 7.31(1.082) | -0.59(0.872) |

* Change from baseline and change from open-label baseline values are arithmetic means(SD). SD: standard deviation.

| **Supplementary Table 6. Changes in Fasting Plasma Glucose (mg/dl) by Scheduled Visits in 52-Week Treatment Period.*** | | | | | | | | | | | |  |
| --- | --- | --- | --- | --- | --- | --- | --- | --- | --- | --- | --- | --- |
|  | **Dorzagliatin+Metformin** | | | | | | **Placebo+Metformin** | | | | | |
|  | **52-week Treatment** | | | **Open-label Treatment** | | | **52-week Treatment** | | | **Open-label Treatment** | | |
|  | N | Mean(SD) | Change from Baseline | N | Mean(SD) | Change from Open-Label Baseline | N | Mean(SD) | Change from Baseline | N | Mean(SD) | Change from Open-Label Baseline |
| Baseline | 376 | 176.04(28.818) | - | - | - | - | 375 | 178.92(30.114) | - | - | - | - |
| Week 4 | 374 | 160.38(34.956) | -15.66(28.224) | - | - | - | 374 | 178.38(34.902) | -0.54(31.068) | - | - | - |
| Week 8 | 368 | 158.76(34.236) | -17.46(30.744) | - | - | - | 367 | 177.84(35.100) | -0.72(30.312) | - | - | - |
| Week 12 | 360 | 161.46(34.974) | -14.04(31.914) | - | - | - | 355 | 173.34(34.290) | -4.14(30.312) | - | - | - |
| Week 16 | 354 | 160.92(35.424) | -14.58(34.128) | - | - | - | 347 | 172.26(33.138) | -5.04(30.690) | - | - | - |
| Week 20 | 350 | 162.72(35.136) | -12.60(35.928) | - | - | - | 346 | 170.10(32.022) | -7.02(31.950) | - | - | - |
| Week 24 | 335 | 163.98(37.566) | -11.52(38.556) | 349 | 163.80(37.368) | - | 335 | 171.72(34.956) | -5.76(33.804) | 343 | 172.08(35.406) | - |
| Week 28 | 326 | 164.34(37.368) | -11.52(37.242) | 326 | 164.34(37.368) | 0.54(30.168) | 325 | 154.08(35.712) | -23.40(36.072) | 325 | 154.08(35.712) | -18.36(30.726) |
| Week 34 | 321 | 163.80(37.422) | -12.06(38.574) | 321 | 163.80(37.422) | 1.08(34.002) | 312 | 156.78(35.964) | -20.52(36.972) | 312 | 156.78(35.964) | -14.58(33.804) |
| Week 40 | 321 | 164.52(38.322) | -10.80(37.368) | 321 | 164.52(38.322) | 2.52(39.114) | 296 | 159.12(36.900) | -18.36(38.502) | 296 | 159.12(36.900) | -12.96(34.866) |
| Week 46 | 305 | 163.98(36.486) | -11.16(35.784) | 305 | 163.98(36.486) | 0.90(39.024) | 301 | 163.80(43.092) | -13.50(41.094) | 301 | 163.80(43.092) | -7.38(42.876) |
| Week 52 | 312 | 166.50(38.214) | -8.64(37.422) | 312 | 166.50(38.214) | 3.96(40.788) | 301 | 162.00(39.186) | -15.30(35.784) | 301 | 162.00(39.186) | -9.54(36.216) |

* Change from baseline and change from open-label baseline values are arithmetic means(SD). SD: standard deviation.

| **Supplementary Table 7. Changes in 2-hour Postprandial Glucose (mg/dl) by Scheduled Visits in 52-Week Treatment Period.*** | | | | | | | | | | | |  | |
| --- | --- | --- | --- | --- | --- | --- | --- | --- | --- | --- | --- | --- | --- |
|  | **Dorzagliatin+Metformin** | | | | | | **Placebo+Metformin** | | | | | | |
|  | **52-week Treatment** | | | **Open-label Treatment** | | | **52-week Treatment** | | | **Open-label Treatment** | | | |
|  | N | Mean(SD) | Change from Baseline | N | Mean(SD) | Change from Open-Label Baseline | N | Mean(SD) | Change from Baseline | N | Mean(SD) | | Change from Open-Label Baseline |
| Baseline | 376 | 338.94(55.386) | - | - | - | - | 374 | 343.08(54.180) | - | - | - | | - |
| Week 12 | 359 | 243.36(71.658) | -95.58(65.214) | - | - | - | 354 | 299.88(57.528) | -42.30(55.548) | - | - | | - |
| Week 24 | 335 | 243.90(71.766) | -95.04(72.090) | 349 | 243.18(71.622) | - | 335 | 291.42(56.772) | -51.66(56.574) | 342 | 291.24(56.844) | | - |
| Week 52 | 311 | 244.44(69.084) | -92.16(69.840) | 311 | 244.44(69.084) | 5.58(68.652) | 300 | 236.34(72.396) | -104.94(72.450) | 300 | 236.34(72.396) | | -52.74(63.198) |

* Change from baseline and change from open-label baseline values are arithmetic means(SD). SD: standard deviation.

| Supplementary Table 8. Adverse events in 24-week double-blind treatment period and additional 28-week open-label treatment period* | | | | | | | | |
| --- | --- | --- | --- | --- | --- | --- | --- | --- |
| Event | **Double-blind treatment period (0-24 week)** | | | | **Open-label treatment period (24-52 week)** | | | |
| **Dorzagliatin+Metformin**  **(N=382)** | | **Placebo+Metformin**  **(N=384)** | | **Dorzagliatin+Metformin - Dorzagliatin+Metformin**  **(N=349)** | | **Placebo+Metformin - Dorzagliatin+Metformin**  **(N=343)** | |
| *No. of Patients (%)* | *No. of Events* | *No. of Patients (%)* | *No. of Events* | *No. of Patients (%)* | *No. of Events* | *No. of Patients (%)* | *No. of Events* |
| Any adverse event | 299 (78.3) | 926 | 278 (72.4) | 826 | 251 (71.9) | 643 | 252 (73.5) | 790 |
| Mild | 274 (717) | 895 | 253 (65.9) | 799 | 226 (64.8) | 607 | 226 (65.9) | 754 |
| Moderate | 23 (6.0) | 27 | 25 (6.5) | 27 | 23 (6.6) | 34 | 24 (7.0) | 33 |
| Severe | 2 (0.5) | 4 | 0 | 0 | 2 (0.6) | 2 | 2 (0.6) | 3 |
| Drug-related adverse event # | 53 (13.9) | 82 | 36 (9.4) | 52 | 29 (8.3) | 43 | 43 (12.5) | 65 |
| Mild | 50 (13.1) | 77 | 35 (9.1) | 51 | 29 (8.3) | 43 | 41 (12.0) | 61 |
| Moderate | 3 (0.8) | 5 | 1 (0.3) | 1 | 0 | 0 | 2 (0.6) | 4 |
| Severe | 0 | 0 | 0 | 0 | 0 | 0 | 0 | 0 |
| Adverse event leading to drug discontinuation¶ | 1 (0.3) | 1 | 3 (0.8) | 4 | 0 | 0 | 2 (0.6) | 3 |
| Adverse event leading to withdrawal from study¶¶ | 1 (0.3) | 1 | 2 (0.5) | 2 | 0 | 0 | 2 (0.6) | 3 |
| Any serious adverse event | 19 (5.0) | 24 | 17 (4.4) | 19 | 11 (3.2) | 12 | 15 (4.4) | 19 |
| Results in death | 1 (0.3) † | 1 | 0 | 0 | 0 | 0 | 0 | 0 |
| Others serious adverse event | 18 (4.7) | 23 | 17 (4.4) | 19 | 11 (3.2) | 12 | 15 (4.4) | 19 |
| Serious adverse event leading to drug discontinuation | 3 (0.8) | 4 | 4 (1.0) | 4 | 2 (0.6) | 2 | 4 (1.2) | 5 |
| Serious adverse event leading to withdrawal from study† | 3 (0.8) | 4 | 3 (0.8) | 3 | 2 (0.6) | 2 | 1 (0.3) | 1 |
| Adverse events in ≥5% of patients‖ |  |  |  |  |  |  |  |  |
| Upper respiratory tract infection | 54 (14.1) | 59 | 52 (13.5) | 60 | 38 (10.9) | 46 | 43 (12.5) | 45 |
| Hyperlipidemia | 52 (13.6) | 61 | 33 (8.6) | 41 | 39 (11.2) | 42 | 51 (14.9) | 62 |
| Protein urine present | 30 (7.9) | 38 | 30 (7.8) | 33 | 29 (8.3) | 31 | 26 (7.6) | 30 |
| Hyperuricemia | 37 (9.7) | 45 | 14 (3.6) | 14 | 19 (5.4) | 22 | 24 (7.0) | 27 |
| Hypertriglyceridemia | 21 (5.5) | 27 | 11 (2.9) | 15 | 14 (4.0) | 16 | 13 (3.8) | 14 |
| Adverse events in at least 5% of patients related to the study drug§ |  |  |  |  |  |  |  |  |
| Upper respiratory tract infection | 0 | 0 | 0 | 0 | 0 | 0 | 0 | 0 |
| Hyperlipidemia | 2 (0.5) | 2 | 1 (0.3) | 1 | 1 (0.3) | 1 | 4 (1.2) | 4 |
| Protein urine present | 0 | 0 | 3 (0.8) | 3 | 2 (0.6) | 2 | 1 (0.3) | 1 |
| Hyperuricemia | 3 (0.8) | 3 | 0 | 0 | 1 (0.3) | 1 | 3 (0.9) | 3 |
| Hypertriglyceridemia | 7 (1.8) | 7 | 2 (0.5) | 2 | 3 (0.9) | 3 | 5 (1.5) | 5 |
| Hypoglycemia |  |  |  |  |  |  |  |  |
| Severe hypoglycemia†† | 0 | 0 | 0 | 0 | 0 | 0 | 0 | 0 |
| Clinically significant hypoglycemia † (Blood glucose level <3.0 mmol/L) | 3 (0.8) | 3 | 0 | 0 | 1 (0.3) | 2 | 0 | 0 |

*Adverse events and serious adverse events that occurred in the 24-week double-blind treatment period and 28-week open-label treatment period among patients in the safety population are included in the table and presented with their preferred terms in the Medical Dictionary for Regulatory Activities, version 23.0. The safety population includes all randomized patients, who took at least one dose of study drugs. Events were included if the date of onset was between the first intake of double-blind study medications and the 7th day after the last dose of study medications.

#Possibly or very likely related to dorzagliatin, as assessed by investigators.

¶Serious adverse events that leading to drug discontinuation are not included.

¶¶ Serious adverse events that leading to withdrawal from study are not included.

†During 24-week double-blind treatment period, one patient in the dorzagliatin+metformin group died (confirmed by the external drug safety committee as sudden death). The patient had type 2 diabetes and established cardiovascular disease, and the event was considered as unlikely related to dorzagliatin by both the investigator and the sponsor.

‖Adverse events in at least 5% of patients in the dorzagliatin+metformin group or the placebo+metformin group were listed in the table.

§Adverse events in at least 5% of patients related to the dorzagliatin was defined as adverse events that were deemed by the investigators to be very likely, or probably related to the dorzagliatin or placebo.

††Severe hypoglycemia is defined as hypoglycemia with severe cognitive impairment requiring external assistance for recovery.

†Clinically significant hypoglycemia is defined as a blood glucose level <3.0 mmol/L, confirmed with a blood glucose meter.

| Supplementary Table 9. Serious adverse events in 24-week double-blind treatment period and additional 28-week open-label treatment period by System Organ Class (SOC) * | | | | |
| --- | --- | --- | --- | --- |
| System Organ Class（SOC）* | **Double-blind treatment period (0-24 week)** | | **Open-label treatment period (24-52 week)** | |
| **Dorzagliatin+Metformin**  **(N=382)** | **Placebo+Metformin**  **(N=384)** | **Dorzagliatin+Metformin - Dorzagliatin+Metformin**  **(N=349)** | **Placebo+Metformin - Dorzagliatin+Metformin**  **(N=343)** |
| *No. of Patients (%)* | *No. of Patients (%)* | *No. of Patients (%)* | *No. of Patients (%)* |
| General disorders and administration site conditions | 1 ( 0.3) | 1 ( 0.3) | 0 | 0 |
| Musculoskeletal and connective tissue | 1 ( 0.3) | 3 ( 0.8) | 1 (0.3) | 0 |
| Injury, poisoning and procedural | 1 ( 0.3) | 1 ( 0.3) | 3 (0.9) | 3 (0.9) |
| Nervous system disorders | 3 ( 0.8) | 1 ( 0.3) | 0 | 4 (1.2) |
| Respiratory, thoracic and mediastinal | 0 | 1 ( 0.3) | 1 (0.3) | 0 |
| Cardiac disorders | 2 ( 0.5) | 0 | 1 (0.3) | 1 (0.3) |
| Infections and infestations | 5 ( 1.3) | 2 ( 0.5) | 1 (0.3) | 1 (0.3) |
| Reproductive system and breast disorders | 0 | 1 ( 0.3) |  |  |
| Eye disorders | 2 ( 0.5) | 1 ( 0.3) | 2 (0.6) | 1 (0.3) |
| Ear and labyrinth disorders | 0 | 1 ( 0.3) | 0 | 0 |
| Hepatobiliary disorders | 0 | 1 ( 0.3) | 0 | 1 (0.3) |
| Renal and urinary disorders | 0 | 2 ( 0.5) | 0 | 0 |
| Gastrointestinal disorders | 3 ( 0.8) | 2 ( 0.5) | 0 | 1 (0.3) |
| Neoplasms benign, malignant and unspecified (incl cysts and polyps) | 2 ( 0.5) | 0 | 0 | 3 (0.9) |
| Metabolism and nutrition disorders | 0 | 0 | 0 | 1 (0.3) |
| Endocrine disorders | 0 | 0 | 2 (0.6) | 0 |
| Blood and lymphatic system disorders | 0 | 0 | 1 (0.3) | 0 |

* Serious adverse events that occurred in the 24-week double-blind treatment period and 28-week open-label treatment period among patients in the safety population are included in the table and classified by System Organ Class (SOC) in the *Medical Dictionary for Regulatory Activities*, version 23.0.
